# Supplementary material
Source: HighWire-hosted journal article supplement (https://ez-admanager.com/highwire/filestream/136138/field_highwire_adjunct_files/0/Sangha_85_1957.pdf)
Supplement: Sangha_85_1957.pdf [file Sangha_85_1957.pdf]

# TIA与轻型缺血性卒中患者的生活质量

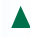

Rajbeer S. Sangha, MD  
Fan Z. Caprio, MD  
Robert Askew, PhD,  
MPH  
Carlos Corado, MS  
Richard Bernstein, MD,  
PhD  
Yvonne Curran, MD  
Ilana Ruff, MD  
David Cella, PhD  
Andrew M. Naidech,  
MD, MSPH  
Shyam Prabhakaran, MD

Correspondence to  
Dr. Prabhakaran:  
sprabhak@nm.org

## 摘要

**目的：**我们使用神经 - 生活质量量表 (Neuro-QOL) 调查短暂性脑缺血发作 (transient ischemic attack, TIA) 与轻型缺血性卒中 (minor ischemic stroke, MIS) 患者的健康相关生活质量 (health-related quality of life, HRQOL)。神经 -QOL 是一项经验证的患者报告的结局评估系统。

**方法：**连续招募符合下列条件的 TIA 或 MIS 患者：(1) 改良 Rankin 量表 (modified Rankin Scale, mRS) 基线评分为 0 或 1, (2) 初始 NIH 卒中量表评分  $\leq 5$ , (3) 无急性再灌注治疗, (4) 随访 3 个月。前瞻性纪录复发性卒中、mRS 和 Barthel 指数评估的残疾、5 个预先设定领域的神经 -QOL 评分。我们评估了 HRQOL 受损患者 [定义为较普通人群的平均 T 评分  $> 0.5$  标准差 (SD)] 的比例, 采用 Logistic 回归分析确定 HRQOL 受损的预测因子。

**结果：**332 例符合研究标准的患者 (平均年龄 65.7 岁, 52.4% 为男性) 中, 47 例 (14.2%) 患者 90 天内卒中复发, 41 例 (12.3%) 患者 3 个月时存在残疾 (mRS  $> 1$  分或 Barthel 指数  $< 95$ )。119 例 (35.8%) 患者出现某一项 HRQOL 受损。多变量分析中, 年龄 [校正比值比 (odds ratio, OR) 1.02, 95% 可信区间 (confidence interval, CI) 1.01 ~ 1.04]、初始 NIH 卒中量表得分 (校正 OR 1.39, 95% CI 1.17 ~ 1.64)、卒中复发 (校正 OR 2.10, 95% CI 1.06 ~ 4.13)、委托人报告 (校正 OR 3.94, 95% CI 1.54 ~ 10.10), 为 3 个月 HRQOL 受损的独立预测因子。

**结论：**TIA 和 MIS 后 3 个月 HRQOL 受损较为常见。HRQOL 受损预测因子包括年龄、卒中严重程度及复发性卒中。HRQOL 可能较传统残疾量表对轻微损害更敏感, 未来研究在结局评估时应纳入该指标。 *Neurology*® 2015;85:1957-1963

## 术语

BI = Barthel 指数; CI = 可信区间; DWI = 弥散加权成像; HRQOL = 健康相关的生活质量; MIS = 轻型缺血性卒中; mRS = 改良 Rankin 量表; NIHSS = NIH 卒中量表; OR = 比值比。

在美国, 绝大部分急诊救治的卒中患者为 TIA 和轻型缺血性卒中 (minor ischemic stroke, MIS) 患者<sup>[1]</sup>。临床症状轻微是拒绝 IV 组织纤溶酶原激活物治疗的常见原因<sup>[2]</sup>。急性缺血性卒中可导致健康相关的生活质量 (health-related quality of life, HRQOL) 下降, 即使对于那些没有或仅有轻微卒中后残疾的患者亦如此<sup>[3]</sup>。尽管大多数症状轻微 [定义为低 NIH 卒中量表 (NIH Stroke Scale, NIHSS) 评分] 的患者预后良好, 但这部分患者仍有约 25% 的患者最终出现残疾<sup>[2]</sup>。

传统上, 利用评估功能状态的残疾量表来评估卒中预后, 往往不能反映疾病和治疗的全面影响。改良 Rankin 量表 (modified Rankin Scale, mRS) 和 Barthel 指数 (Barthel Index, BI) 是测量卒中后残疾与障碍使用频率最高的工具<sup>[4]</sup>。国立神经疾病和卒中研究所提供经费以期解决这些缺陷, 神经 -QOL 应运而生并成为评估成人和儿童神经系统疾病患者的一个临床稳健且经过验证的患者报告的 HRQOL 评估工具<sup>[5,6]</sup>。我们旨在 (1) 对比神经 -QOL 评估方法与 mRS 和 BI 等传统评估方法, (2) 确定 TIA 和 MIS 后 HRQOL 受损的预测因子。

补充数据见  
[Neurology.org](http://Neurology.org)

From the Departments of Neurology (R.S.S., F.Z.C., C.C., R.B., Y.C., I.R., A.M.N., S.P.) and Medical Social Sciences (R.A., D.C.), Northwestern University Feinberg School of Medicine, Chicago, IL.

Go to [Neurology.org](http://Neurology.org) for full disclosures. Funding information and disclosures deemed relevant by the authors, if any, are provided at the end of the article.

**方法 标准方案审批、登记与患者知情同意。**该研究已通过当地机构审查委员会审批。在西北大学卒中中登记处连续招募 ≥ 18 岁、过去 12 个月 (2012 年 8 月 1 日 ~ 2013 年 7 月 31 日) 有明确急性缺血性卒中或 TIA 的患者入组。患者或其合法授权委托人签署书面知情同意书。

**队列筛选。**MIS 定义为除外其他疾病的突发神经功能缺损持续 > 24 小时、初始 NIHSS 评分 ≤ 5、和/或弥散加权成像 (diffusion-weighted imaging, DWI) 示明确的急性缺血梗死灶; 无论症状持续时间如何, DWI 有异常即视为 MIS<sup>[9]</sup>。TIA 定义为排除其他诊断, 突发神经功能缺损症状持续 < 24 小时且 DWI 上未见急性损害灶。对于未行 DWI 检查的患者 (n = 14) 则根据症状持续时间作出临床诊断。由我机构的一位经资格认证的脑血管神经病学医师对每一位病例作出诊断。连续招募符合下列条件的患者: (1) 如上述定义的 TIA 或 MIS; (2) 未经急性再灌注治疗; (3) 基线 mRS 评分为 0 或 1; (4) 有完整的 3 个月随访数据 (图 1)。

**受试者的评估指标。**前瞻性收集人口统计学资料、采用 mRS 评估的基线残疾 (卒中前)、保险状态、NIHSS 评分、危险因素及并发症、住院经过及治疗信息。根据既往病

史、用药史或临床或实验室表现定义高血压、糖尿病、血脂异常、既往卒中史、心房颤动或心房扑动、心脏疾病 (既往或现有心绞痛、心肌梗塞、冠状动脉旁路手术或介入术, 或充血性心力衰竭)。再灌注治疗定义为接受 IV 或动脉内组织纤溶酶原激活物和/或机械血栓取栓术。经资格认证的神经病学医师前瞻性地回顾分析临床和影像学数据以确定每一例确诊病例的 TOAST (Trial of Org 10172 in Acute Stroke Treatment, TOAST) 分型<sup>[9]</sup>; 由专家组进行裁定以避免评定者间信度问题<sup>[9]</sup>。由一位对结局数据不知情的研究者独立回顾性分析基线影像学资料, 以查找 DWI 病变部位及血管支配区域。我们前瞻性地监测卒中后患者住院治疗期间的并发症。住院期间复发性卒中定义为: 新发或初始神经症状加重持续 > 24 小时, 排除其他诊断。根据一个经过验证的卒中症状报告的调查问卷记录住院后卒中复发, 并审查医疗记录以确认。

**队列筛选。**利用功能结局量表及特定领域 HRQOL 评分前瞻性地评估 3 个月预后。功能结局量表包括 mRS 和 BI。mRS 是一个残疾量表, 范围由无症状 (0 分) 至死亡 (6 分), BI 是日常生活活动的序数量法, 评分范围由完全卧床不起 (0 分) 至完全独立 (100 分)<sup>[10]</sup>。我们根据电话访问 (经验证的评估方法<sup>[11,12]</sup>) 获得 mRS 和 BI 数据。我们采用先前发表的 3 个月时间节点的良好预后的定义 (BI 为 95 或 100 分, mRS 0 或 1 分)<sup>[13]</sup>。

随访 3 个月, 患者或其委托人使用下述 5 项神经-QOL 工具 (SF 1.0 版本) 完成一系列特定领域的 HRQOL 评估: 上肢功能 (精细运动、伸展活动)、下肢功能 (移动性包括上下楼梯或在平坦的路面上行走)、对社会角色及活动的满意度、应用认知-执行功能 (规划、组织、计算、需记忆和学习的工作)、认知-普遍关注 (意识到记忆、注意、决策能力困难)。神经-QOL 结果参照美国普通人群 (均值为 50, SD 10) 的人口统计学资料用 T 值来表示, (附加信息见 [www.neuroqol.org](http://www.neuroqol.org))<sup>[5,6,14]</sup>。

**统计分析。**数据采用数量 (百分比)、平均值 (SD) 或中位数 (四分位距) 来表示, 具体视情况而定。我们计算残疾患者 (定义为 mRS > 1 或 BI < 95) 和 5 项神经-QOL 领域任一 HRQOL 受损的患者比例。我们将 HRQOL 受损定义为任一神经-QOL 领域 T 评分 < 45 (较普通人群均值 > 0.5 SD, 是对有临床意义的最小差异的保守估计)<sup>[15]</sup>。

我们评估了患者的基线人口统计学资料、临床、住院过程中的变量、3 个月时有或无 HRQOL 受损的残疾评估, 并采用 Pearson  $\chi^2$  检验对分类变量进行分析 (适当时候使用 Fisher 精确检验), 采用 t 检验对正态分布的连续变量进行分析, 采用 Mann-Whitney U 检验对有

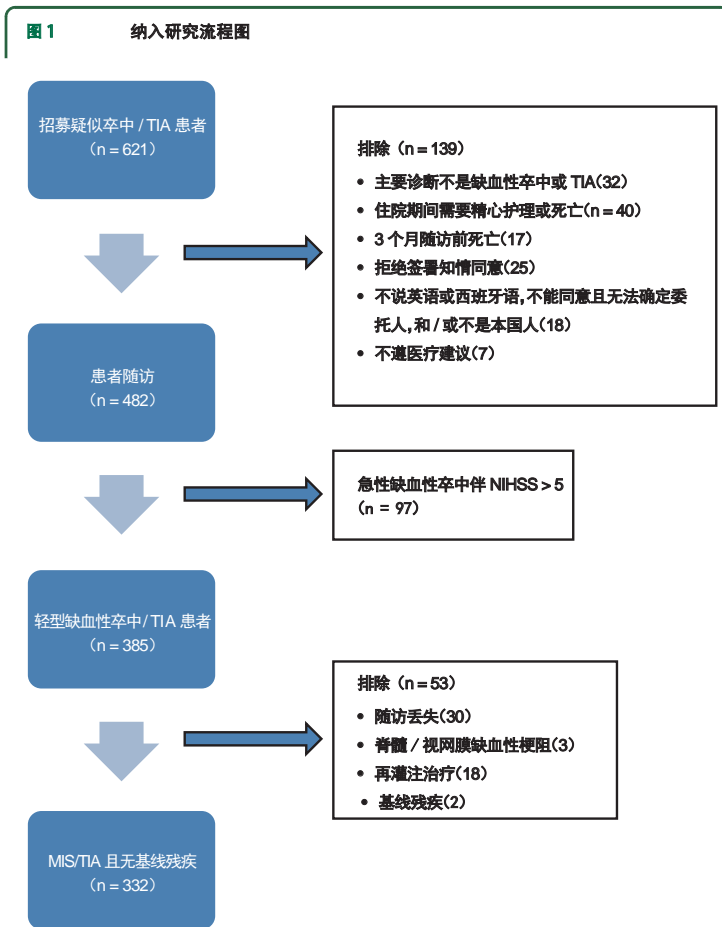

IS = 缺血性卒中; MIS = 轻型缺血性卒中; NIHSS = NIH卒中量表;

**表 1** 整体特定领域量表评分、生活质量受损比例与卒中诊断类型 (MIS与TIA) 分层

|                       | 上肢功能       | 下肢功能       | 普遍关注度      | 执行功能       | 社会满意       |
|-----------------------|------------|------------|------------|------------|------------|
| <b>整体队列 (n = 332)</b> |            |            |            |            |            |
| 平均 (SD) T评分           | 51.4 (5.7) | 49.6 (8.1) | 55 (6.0)   | 53.1 (7.0) | 53.2 (7.3) |
| T评分 < 45, n(%)        | 55 (16.6)  | 77 (23.2)  | 24 (7.2)   | 31 (9.3)   | 43 (13.0)  |
| T评分 < 40, n(%)        | 38 (11.4)  | 23 (6.9)   | 8 (2.4)    | 17 (5.1)   | 8 (2.4)    |
| <b>MIS (n = 257)</b>  |            |            |            |            |            |
| 平均 (SD) T评分           | 51.1 (6.1) | 49.0 (8.5) | 54.9 (6.2) | 52.9 (7.5) | 52.4 (7.4) |
| T评分 < 45, n(%)        | 49 (19.1)  | 65 (25.3)  | 22 (8.6)   | 29 (11.3)  | 40 (15.6)  |
| T评分 < 40, n(%)        | 19 (7.4)   | 37 (14.4)  | 8 (3.1)    | 16 (6.2)   | 8 (3.1)    |
| <b>TIA (n = 75)</b>   |            |            |            |            |            |
| 平均 (SD) T评分           | 52.6 (4.1) | 50.0 (6.3) | 55.5 (5.1) | 53.6 (4.9) | 56.2 (5.9) |
| T评分 < 45, n(%)        | 6 (8.0)    | 12 (16.0)  | 2 (2.7)    | 2 (2.7)    | 3 (4.0)    |
| T评分 < 40, n(%)        | 4 (5.3)    | 1 (1.3)    | 0 (0)      | 1 (1.3)    | 0 (0)      |

缩略语: MIS = 轻型缺血性卒中。

变量和非正态分布的连续变量进行分析。Kolmogorov-Smirnov 检验用于评估正态性。

我们建立了多因素模型用以甄别 3 个月 HRQOL 受损的预测因子, 包括那些显示为单变量相关的变量 ( $p < 0.05$ )。我们采用逐步向后变量剔除法形成最终模型。估算比值比 (Odds ratios, OR) 和 95% 可信区间 (confidence intervals, CI)。采用 Hosmer-Lemeshow 检验评估最终模型的拟合度。我们仅对与 HRQOL 受损有关的基

线和住院因素 (即去除出院后因素, 如卒中复发) 进行了敏感性分析。最后, 对 MIS 与 TIA 患者进行分层单因素分析。采用标准的统计学软件 (IBM SPSS 版本 22, 纽约阿蒙克市)。 $p$  值  $< 0.05$  视为有统计学意义。由于该项目为探索性研究, 未对多因素比较进行校正。

**结果** 纳入分析的 332 例患者 (平均年龄  $65.7 \pm 15.3$  岁, 男性占 52.4%, 白种人占 68.1%, 西班牙裔占 6.9%, TIA 占 29.2%) 中, 47 例 (14.2%) 患者 3 个月内出现复发性卒中, 41 例 (12.3%) 3 个月时残疾 (mRS 评分  $> 1$  或 BI  $< 95$ )。29 例 (8.7%) 患者的 3 个月结局数据由其委托人提供。在 119 例 (35.8%) 患者中记录到存在任一 HRQOL 受损 (5 项领域中任一领域  $T < 45$ ), 其中无残疾患者占 27.1% 和残疾患者占 97.6% ( $p < 0.001$ )。采用更为保守的临界值 ( $T < 40$  或 1 SD), 52 例 (15.7%) 患者 5 项领域中至少有 1 项 HRQOL 损害, 主要损害是上下肢的功能 (表 1)。卒中 (MIS vs TIA) 分层分析显示, MIS 患者较 TIA 患者受损更多 (39.7% vs 22.7%,  $p < 0.001$ )。3 个月内残疾患者的平均 T 评分较无残疾患者低 (全部 5 个领域  $p < 0.001$ ), 绝对差异范围 8~15 分 (图 2)。

在单因素分析时, 年龄、危险因素 (糖尿病、高血压病、心脏病)、发病时初始 NIHSS 评分、DWI 上急性梗死表现、MIS 诊断 (vs TIA)、复发性卒中、委托人报告 (vs 患者) 均与 3 个

**图 2** 3个月时有或无残疾患者神经-QOL各个领域平均T评分的比较

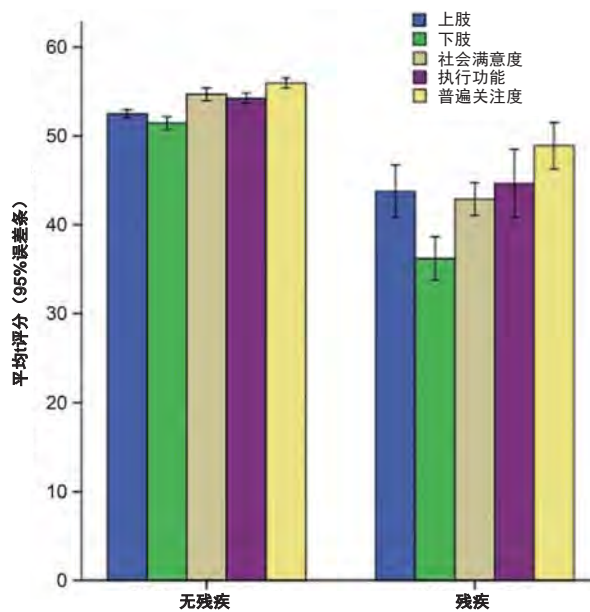

每一领域特定比较,  $p < 0.001$ 。

月时 HRQOL 受损有关 (表 2)。卒中症状类型(运动、感觉、视觉或语言/语音)、性别、人种、种族、既往卒中史、心房颤动、目前吸烟史、慢性肾脏疾病史、保险状态、基线生活水平、基线 mRS 评分、住院期间并发症与 HRQOL 受损无关。对 MIS 与 TIA 患者的分层分析显示, MIS 亚组与 TIA 患者的结果相似, 除年龄外其他均无意义 (表 e-1 和 e-2 见 *Neurology*<sup>®</sup> 官网: [Neurology.org](http://Neurology.org))。

在对年龄、糖尿病、高血压病、心脏病、初始 NIHSS 评分、MIS (vs TIA)、复发性卒中、委托人报告的多因素分析中, 3 个月时 HRQOL 受损的独立预测因子为年龄、初始 NIHSS 评分、复发性卒中、委托人报告 (表 3)。当仅限定在基线和住院预测因子时, 年龄 (校正 OR 1.01, 95% CI 1.01~1.05)、NIHSS 评分 (校正 OR 1.43, 95% CI 1.21~1.68)、

MIS 或 TIA (校正 OR 1.91, 95% CI 1.01~3.63) 均为 3 个月时 HRQOL 受损的独立预测因子。

**讨论** 在这项关于 MIS 或 TIA 后利用神经-QOL 工具评估患者报告结局的新型研究中, 我们观察到 (1) 3 个月时, 超过 1/3 患者在 HRQOL 各个领域报告了损害; (2) 尽管超过 1/4 无残疾的 MIS/TIA 患者发现 HRQOL 受损, 但神经-QOL 评分与传统残疾评价方法 (采用 mRS 和 BI) 一致性良好; (3) 年龄、卒中严重程度、复发性卒中是 HRQOL 受损的预测因子。

mRS 评分一直以来是用于临床试验中评估卒中后功能结局的主要工具, 有很多优势<sup>[16]</sup>, 包括一致性信度较高<sup>[17]</sup>、采用经验证的问卷<sup>[18,19]</sup>, 并在高知名度卒中试验中用作标准性结局指标<sup>[12]</sup>。在卒中幸存者中 mRS 与 HRQOL

**表 2** TIA或MIS后3个月QOL正常及受损患者的基线人口统计学资料、临床病史及结局 (n = 332)

|                    | 3月时QOL正常<br>(n = 213) | 3月时QOL受损<br>(n = 119) <sup>a</sup> | P 值    |
|--------------------|-----------------------|------------------------------------|--------|
| <b>人口统计学</b>       |                       |                                    |        |
| 年龄 (SD), 岁         | 63.3 (14.9)           | 69.9 (15.1)                        | <0.001 |
| 男性, n (%)          | 118 (55.4)            | 56 (47.1)                          | 0.145  |
| 人种, n (%)          |                       |                                    | 0.525  |
| 白种人                | 148 (69.5)            | 78 (65.5)                          |        |
| 非裔美国人              | 56 (26.3)             | 35 (29.4)                          |        |
| 亚裔                 | 9 (4.2)               | 5 (4.2)                            |        |
| 其他                 | 0                     | 1 (0.8)                            |        |
| 西班牙裔, n (%)        | 12 (5.6)              | 11 (9.2)                           | 0.214  |
| 医疗保险或私人保险, n (%)   | 188 (88.3)            | 102 (85.7)                         | 0.503  |
| 基线与家人生活, n (%)     | 164 (77.0)            | 84 (70.6)                          | 0.199  |
| 基线mRS评分, 中位数 (IQR) | 0 (0-0)               | 0 (0-0)                            | 0.211  |
| <b>合并疾病, n (%)</b> |                       |                                    |        |
| 糖尿病                | 43 (20.2)             | 36 (30.3)                          | 0.039  |
| 高脂血症               | 164 (77.0)            | 87 (73.1)                          | 0.429  |
| 心房颤动               | 25 (11.7)             | 23 (19.3)                          | 0.059  |
| 心脏病                | 32 (15.0)             | 29 (24.4)                          | 0.035  |
| 既往卒中史              | 32 (15.0)             | 28 (23.5)                          | 0.053  |
| 慢性肾脏病              | 15 (7.0)              | 16 (13.4)                          | 0.054  |
| 高血压                | 154 (72.3)            | 98 (82.4)                          | 0.040  |
| 过去6个月内吸烟           | 105 (49.3)            | 47 (39.5)                          | 0.108  |
| <b>临床、医院、影像学特征</b> |                       |                                    |        |
| NIHSS评分, 中位数 (IQR) | 1 (0-2)               | 2 (1-3)                            | 0.001  |
| 运动症状, n (%)        | 62 (29.1)             | 35 (29.4)                          | 0.953  |
| 感觉症状, n (%)        | 23 (10.8)             | 6 (5.0)                            | 0.104  |
| 视觉症状, n (%)        | 40 (18.8)             | 20 (16.8)                          | 0.654  |

续

表2 续

|                           | 3月时QOL正常<br>(n = 213) | 3月时QOL受损<br>(n = 119) <sup>a</sup> | P 值    |
|---------------------------|-----------------------|------------------------------------|--------|
| 语言/发音症状, n (%)            | 120 (56.3)            | 75 (63.0)                          | 0.235  |
| 需住院并发症, n (%)             | 32 (15.0)             | 26 (21.8)                          | 0.116  |
| DWI异常, n (%) <sup>b</sup> | 150 (72.1)            | 95 (86.4)                          | 0.005  |
| MIS (vs TIA)              | 155 (72.8)            | 102 (85.7)                         | 0.006  |
| TOAST亚型, n (%)            |                       |                                    | 0.314  |
| 心源性栓塞                     | 37 (17.4)             | 25 (40.3)                          |        |
| 大动脉粥样硬化                   | 36 (16.9)             | 24 (20.2)                          |        |
| 小动脉疾病                     | 31 (14.6)             | 21 (17.6)                          |        |
| 其他                        | 31 (14.6)             | 9 (7.6)                            |        |
| 不明原因                      | 79 (36.6)             | 40 (33.6)                          |        |
| 3个月数据, n (%)              |                       |                                    |        |
| 3个月时委托人 (vs患者) 报告         | 7 (3.3)               | 22 (18.5)                          | <0.001 |
| 间断住院康复                    | 40 (18.8)             | 70 (58.8)                          | <0.001 |
| 3个月内卒中复发                  | 23 (10.8)             | 24 (20.2)                          | 0.019  |
| 3个月mRS评分0-1               | 212 (99.5)            | 87 (73.1)                          | <0.001 |
| 3个月时BI 95-100             | 213 (100)             | 85 (71.4)                          | <0.001 |

缩略语: BI = Barthel指数; DWI = 弥散加权成像; IQR = 四分位距; MIS = 轻型缺血性卒中; mRS = 改良的Rankin评分; NIHSS = NIH卒中评分; QOL = 生活质量; TOAST = 急性卒中治疗Org10172试验。

<sup>a</sup>HRQOL受损定义为某一项神经-QOL领域 (上肢功能、下肢功能、执行功能、普遍关注度、社会满意度) 的T评分 < 45。

<sup>b</sup>14例患者未行DWI检查

关系较大<sup>[20]</sup>, 在出血性卒中患者中 mRS 与神经-QOL 评分紧密契合, mRS 每 1 分的改变与 T 值评分运动功能领域约 7 分改变相当<sup>[14]</sup>。但是, 神经-QOL 评分可提供不良结局的原因 (即: 活动性差 vs 无法管理自己的事务), 这正是 mRS 的劣势。神经-QOL 评分亦克服了已知的制约 mRS 的天花板效应。Stewart 和 Cramer<sup>[21]</sup> 先前观察到: 21 例经 mRS 和 NIHSS 评分评估无残疾但影像学确认卒中的患者中, 有 71% 的患者根据脑卒中结局量表报告有上肢活动问题或根据运动活动日志评分报告手臂使用减少。因此, 在这情况下, 我

们发现 mRS 或 BI 评估为无残疾的患者报告有 HRQOL 损害也就不足为奇了。

HRQOL 已经经过很多人群评估, 对缺血性卒中和 TIA 患者很重要<sup>[3,22,23]</sup>。目前尚无神经-QOL 与其他卒中特定的 QOL 量表 (如卒中影响量表) 的正式对比, 神经-QOL 的优点可能包括 (1) 根据最可能受疾病影响的结局选择领域 (即上下肢功能、认知和执行功能)、(2) 连续规范化评分可简化分析与解释、(3) 具有不同疾病间评分对比的能力 (如卒中患者的执行功能 vs 多发性硬化患者的执行功能)。

3 个月内残疾的患者中下肢功能的平均 T 评分最低 (最差), 强调了运动功能对残疾的重要性。事实上, 约 1/4 患者报告有下肢功能受损。除运动性主诉外, 几项研究还注意到 TIA 后的认知、交流问题及疲乏<sup>[24-27]</sup>。与其他研究一致, 7% ~ 13% TIA 和 MIS 患者有自我报告的执行功能、普遍关注度、社会满意度受损。

很多假说可以解释 MIS 后的残疾。首先, 卒中可能导致不可评估的 (尤其是认知) 和未引起重视的缺陷。其次, 可发生早期复发性卒中。第三, 在长期随访中, 临床并发症、医学治疗、卒中后护理 (即康复)

表3 TIA或MIS后3个月健康相关生活质量受损的独立预测因子的多变量模型

|                 | 校正OR | 95%CI      |
|-----------------|------|------------|
| 年龄 (/岁)         | 1.02 | 1.01-1.04  |
| NIHSS评分 (最高达5分) | 1.39 | 1.17-1.64  |
| 复发性卒中           | 2.10 | 1.06-4.13  |
| 代理人报告           | 3.94 | 1.54-10.10 |

缩略语: CI = 可信区间; MIS = 轻型缺血性卒中; NIHSS = NIH 卒中评分; OR = 比值比。

<sup>a</sup>校正年龄、糖尿病、高血压病、心脏病、初始NIHSS评分、MIS(TIA)、复发性卒中、委托人 (vs患者) 报告; Hosmer-Lemeshow 检验示拟合良好 ( $p = 0.738$ )。

可影响残疾；如患者可能因为接受 $\beta$ 受体阻滞剂治疗而诉疲劳<sup>[28]</sup>或加用抗凝药物出现心理损害<sup>[29]</sup>。

之前有项研究发现早期脑部 MRI 示梗死病灶增长预示着 MIS 后残疾，可能是关键的预测因子<sup>[30,31]</sup>。然而，CHANCE 试验的一项近期分析显示，复发性卒中中 MIS 和 TIA 后 HRQOL 有着重要决定作用<sup>[32]</sup>。我们观察到卒中严重程度和复发性卒中是 HRQOL 受损的独立预测因子，这与先前这些研究结果一致。

我们采用 T 评分 < 45 或超过普通人群均值约 0.5 SD 作为神经 -QOL 受损的临界值。这个差异很可能是有意义的。Norman 等人<sup>[33]</sup>根据 33 项研究中估算的具有临床意义的最小差异而得到的效应量分布进行完全分析显示，当要求对患慢性病患者甄别出最小临床意义改变时，估算值会下降至非常接近 0.5 SD。我们也采用电话访视。神经 -QOL 可通过面对面访问、电话、网上的自我管理来实施。Bjorner 等人<sup>[34]</sup>最近的一项研究显示，对于 PROMIS（患者结局预后报告信息采集系统）测量，评分的有效性和可靠性不受管理模式（即，电话、电脑、纸笔、掌上设备）的影响。神经 -QOL 评估与 PROMIS 评估由同一组调查人员使用相似的开发方案开发而来。

我们的研究有前瞻性设计、3 个月纵向随访等优势，但也存在局限性。首先，作为一个来自单一城市学术医疗中心的报告，我们的结果可能不能推广至所有单位。有必要进行不同地区多中心队列研究重复验证本试验结果。第二，我们报道的 MIS 和 TIA 后的残疾率（12.3%）低于先前研究报道的 25% 的残疾率，因为我们纳入了所有时间窗（即，不仅是再灌注或超急性窗）的患者且仅纳入 3 个月随访时存活的患者。第三，神经 -QOL 评估是患者自行报告的结局；该文未对 MIS 和 TIA 后的认知及心理功能进行客观评估，因此，我们无法评论认知损害和心理障碍的程度。第四，未评估 HRQOL 的其他方面如疲劳、语言功能或抑郁。第五，无法评估卒中前后 T 评分的改变。我们没有收集卒中前的 HRQOL，因为执行起来很繁琐而且未在住院患者中验证过。最后，HRQOL 评估需要患者的积极参与，因此若在评估过程中患者对此失去兴趣或厌烦则可能造成结果的不准确。

神经 -QOL 为研究者与临床医师评估 HRQOL 提供了一种新颖工具。MIS 或 TIA 后 3 个月的 HRQOL 受损非常常见，甚至是那些经传统结局量表（如 mRS）评估为无残疾的患者。HRQOL 受损的预测因子包括年龄、卒中严重性、复发性卒中。未来关于 TIA 和 MIS 后结局评估的研究中应纳入神经 -QOL 评估法，可能弥补传统残疾量表对轻微异常不敏感这一不足。

## 作者贡献

Dr. Sangha: acquisition of data, analysis and interpretation, writing the paper. Dr. Caprio: analysis, drafting of manuscript, and critical revision of manuscript. Dr. Askew: analysis and interpretation, critical revision of manuscript. Mr. Corado: acquisition of data. Dr. Bernstein: acquisition of data, critical revision of the manuscript for important intellectual content. Dr. Curran: acquisition of data. Dr. Ruff: acquisition of data. Dr. Cella: critical revision of the manuscript for important intellectual content. Dr. Naidech: critical revision of the manuscript for important intellectual content. Dr. Prabhakaran: study concept and design, analysis and interpretation, critical revision of the manuscript for important intellectual content.

## 研究基金

No targeted funding reported.

## 声明

R. Sangha, F. Caprio, R. Askew, and C. Corado report no disclosures relevant to the manuscript. R. Bernstein reports disclosures of consultant, research funding, and speakers bureau from the following companies: Medtronic, Boehringer Ingelheim, Pfizer/Bristol-Myers alliance. Y. Curran and I. Ruff report no disclosures relevant to the manuscript. D. Cella reports disclosures of receiving research funding from the National Institute of Neurologic Disorders and Stroke (NINDS) contract HHSN271201200036C for funding of QOL research, multiple NIH grants, Pfizer, Novartis, Biogen Idec, Clovis, and Bayer. Industry relationships that involve consulting include Pfizer, Novartis, Clovis, Astellas, Biogen Idec, Daiichi Sankyo, Inc., AstraZeneca, Genentech, and Bayer. A. Naidech reports disclosures of receiving salary support from the NINDS contract HHSN271201200036C and unrelated funding from Gaymar Inc. S. Prabhakaran reports disclosures of receiving funding from NINDS (U10NS08660, R01NS084288) and PCORI (AD-1310-07237). Go to Neurology.org for full disclosures.

Received February 25, 2015. Accepted in final form June 29, 2015.

## 参考文献

1. Reeves M, Khoury J, Alwell K, et al. Distribution of National Institutes of Health Stroke Scale in the Cincinnati/Northern Kentucky Stroke Study. *Stroke* 2013;44:3211–3213.
2. Smith EE, Fonarow GC, Reeves MJ, et al. Outcomes in mild or rapidly improving stroke not treated with intravenous recombinant tissue-type plasminogen activator: findings from Get With the Guidelines—Stroke. *Stroke* 2011;42:3110–3115.
3. Lai SM, Studenski S, Duncan PW, Perera S. Persisting consequences of stroke measured by the Stroke Impact Scale. *Stroke* 2002;33:1840–1844.
4. D’Olhaberriague L, Litvan I, Mitsias P, Mansbach HH. A reappraisal of reliability and validity studies in stroke. *Stroke* 1996;27:2331–2336.
5. Cella D, Lai JS, Nowinski CJ, et al. Neuro-QOL: brief measures of health-related quality of life for clinical research in neurology. *Neurology* 2012;78:1860–1867.
6. Cella D, Nowinski C, Peterman A, et al. The neurology quality-of-life measurement initiative. *Arch Phys Med Rehabil* 2011;92(suppl):S28–S36.

7. Sacco RL, Kasner SE, Broderick JP, et al. An updated definition of stroke for the 21st century: a statement for healthcare professionals from the American Heart Association/American Stroke Association. *Stroke* 2013;44:2064–2089.
8. Adams HP Jr, Bendixen BH, Kappelle LJ, et al. Classification of subtype of acute IS: definitions for use in a multicenter clinical trial. Trial of Org 10172 in Acute Stroke Treatment (TOAST). *Stroke* 1993;24:35–41.
9. Goldstein LB, Jones MR, Matchar DB, et al. Improving the reliability of stroke subgroup classification using the Trial of ORG 10172 in Acute Stroke Treatment (TOAST) criteria. *Stroke* 2001;32:1091–1098.
10. Granger CV, Devis LS, Peters MC, Sherwood CC, Barrett JE. Stroke rehabilitation: analysis of repeated Barthel Index measures. *Arch Phys Med Rehabil* 1979;60:14–17.
11. Bruno A, Akinwuntan AE, Lin C, et al. Simplified modified Rankin Scale questionnaire: reproducibility over the telephone and validation with quality of life. *Stroke* 2011;42:2276–2279.
12. Janssen PM, Visser NA, Dorhout Mees SM, Klijn CJ, Algra A, Rinkel GJ. Comparison of telephone and face-to-face assessment of the modified Rankin Scale. *Cerebrovasc Dis* 2010;29:137–139.
13. The National Institute of Neurological Disorders and Stroke rt-PA Stroke Study Group. Tissue plasminogen activator for acute ischemic stroke. *N Engl J Med* 1995;333:1581–1587.
14. Naidech AM, Beaumont JL, Berman M, et al. Web-based assessment of outcomes after subarachnoid and intracerebral hemorrhage: a new patient centered option for outcomes assessment. *Neurocrit Care* 2015;23:22–27.
15. Sloan J, Cella D, Hays R. Clinical significance of patient-reported questionnaire data: another step toward consensus. *J Clin Epidemiol* 2005;58:1217–1219.
16. Weimar C, Kurth T, Kraywinkel K, et al. Assessment of functioning and disability after ischemic stroke. *Stroke* 2002;33:2053–2059.
17. Banks JL, Marotta CA. Outcomes validity and reliability of the modified Rankin Scale: implications for stroke clinical trials: a literature review and synthesis. *Stroke* 2007;38:1091–1096.
18. Saver JL, Filip B, Hamilton S, et al. Improving the reliability of stroke disability grading in clinical trials and clinical practice: the Rankin Focused Assessment (RFA). *Stroke* 2010;41:992–995.
19. Wilson JTL, Hareendran A, Grant M, et al. Improving the assessment of outcomes in stroke: use of a structured interview to assign grade on the modified Rankin Scale. *Stroke* 2002;33:2243–2246.
20. Ali M, Fulton R, Quinn T, Brady M, Collaboration V. How well do standard stroke outcome measures reflect quality of life? A retrospective analysis of clinical trial data. *Stroke* 2013;44:3161–3165.
21. Stewart JC, Cramer SC. Patient-reported measures provide unique insights into motor function after stroke. *Stroke* 2013;44:1111–1116.
22. Bushnell CD, Reeves MJ, Zhao X, et al. Sex differences in quality of life after ischemic stroke. *Neurology* 2014;82:922–931.
23. Verbraak ME, Hoeksma AF, Lindeboom R, Kwa VI. Subtle problems in activities of daily living after a transient ischemic attack or an apparently fully recovered non-disabling stroke. *J Stroke Cerebrovasc Dis* 2012;21:124–130.
24. Fens M, van Heugten CM, Beusmans GH, et al. Not as transient: patients with transient ischaemic attack or minor stroke experience cognitive and communication problems: an exploratory study. *Eur J Gen Pract* 2013;19:11–16.
25. Muus I, Petzold M, Ringsberg KC. Health-related quality of life among Danish patients 3 and 12 months after TIA or mild stroke. *Scand J Caring Sci* 2010;24:211–218.
26. Franzen-Dahlin A, Laska AC. Gender differences in quality of life after stroke and TIA: a cross-sectional survey of out-patients. *J Clin Nurs* 2012;21:2386–2391.
27. Moran GM, Fletcher B, Feltham MG, Calvert M, Sackley C, Marshall T. Fatigue, psychological and cognitive impairment following transient ischaemic attack and minor stroke: a systematic review. *Eur J Neurol* 2014;21:1258–1267.
28. Ko DT, Hebert PR, Coffey CS, Sedrkyan A, Curtis JP, Krumholz HM.  $\beta$ -Blocker therapy and symptoms of depression, fatigue, and sexual dysfunction. *JAMA* 2002;288:351–357.
29. Corbi ISA, Dantas RAS, Pelegrino FM, Carvalho ARS. Health related quality of life of patients undergoing oral anticoagulation therapy. *Rev Lat Am Enfermagem* 2011;19:865–873.
30. Khatri P, Conaway MR, Johnston KC; Acute Stroke Accurate Prediction Study (ASAP) Investigators. Ninety-day outcome rates of a prospective cohort of consecutive patients with mild ischemic stroke. *Stroke* 2012;43:560–562.
31. Coutts SB, Hill MD, Eliasziw M, Fischer K, Demchuk AM; VISION Study Group. Final 2 year results of the Vascular Imaging of Acute Stroke for Identifying Predictors of Clinical Outcome and Recurrent Ischemic Events (VISION) Study. *BMC Cardiovasc Dis* 2011;11:18.
32. Wang YL, Pan YS, Zhao XQ, et al; CHANCE investigators. Recurrent stroke was associated with poor quality of life in patients with transient ischemic attack or minor stroke: finding from the CHANCE trial. *CNS Neurosci Ther* 2014;20:1029–1035.
33. Norman GR, Sloan JA, Wywich KW. Interpretation of changes in health-related quality of life: the remarkable universality of half a standard deviation. *Med Care* 2003;41:582–592.
34. Bjorner JB, Rose M, Gandek B, Stone AA, Junghaenel DU, Ware JE Jr. Method of administration of PROMIS scales did not significantly impact score level, reliability, or validity. *J Clin Epidemiol* 2014;67:108–113.

(刘丽萍 审校)
